# Supplementary material for: Plasmonic Au@Ag Core–Shell Nanoisland Film for Photothermal Inactivation and Surface-Enhanced Raman Scattering Detection of Bacteria
Source: MDPI journal article supplement (doi:10.3390/nano14080695), 2024-04-17
Supplement: s1 [file s1]

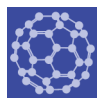

## Supporting Materials

# Plasmonic Au@Ag Core-Shell Nanoisland Film for Photothermal Inactivation and SERS Detection of Bacteria

Sadang Husain <sup>1,2</sup>, Chinmaya Mutalik <sup>3</sup>, Sibidou Yougbaré <sup>4</sup>, Chun-You Chen <sup>5,6,7,\*</sup> and Tsung-Rong Kuo <sup>1,3,8,\*</sup>

<sup>1</sup> International Ph.D. Program in Biomedical Engineering, College of Biomedical Engineering, Taipei Medical University, Taipei 11031, Taiwan; d845110001@tmu.edu.tw

<sup>2</sup> Department of Physics, Faculty of Mathematics and Natural Science, Lambung Mangkurat University, Banjarmasin 70124, Indonesia

<sup>3</sup> Graduate Institute of Nanomedicine and Medical Engineering, College of Biomedical Engineering, Taipei Medical University, Taipei 11031, Taiwan; cm121193@tmu.edu.tw

<sup>4</sup> Institut de Recherche en Sciences de La Santé/Direction Régionale du Centre Ouest (IRSS/DRCO), Nanoro BP 218, 11, Burkina Faso; ysibidou@gmail.com

<sup>5</sup> Artificial Intelligence Research and Development Center, Wan Fang Hospital, Taipei Medical University, Taipei 11696, Taiwan

<sup>6</sup> Department of Radiation Oncology, Wan Fang Hospital, Taipei Medical University, Taipei 11696, Taiwan

<sup>7</sup> Graduate Institute of Biomedical Informatics, College of Medical Science and Technology, Taipei Medical University, Taipei 11031, Taiwan

<sup>8</sup> Stanford Byers Center for Biodesign, Stanford University, Stanford, CA 94305, USA

\* Correspondence: Correspondence: wfrtmouse@gmail.com (C.-Y.H.); trkuo@tmu.edu.tw (T.-R.K.)

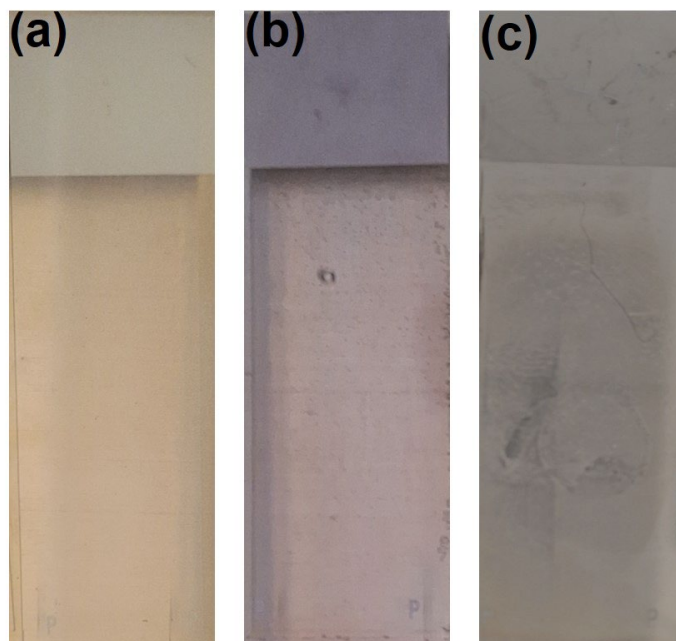

**Figure S1.** Photographic images of Au@AgNIFs during synthesis (a) deposition of Au<sup>3+</sup> ions, (b) growth of Au seeds, and (c) growth of Ag shells.

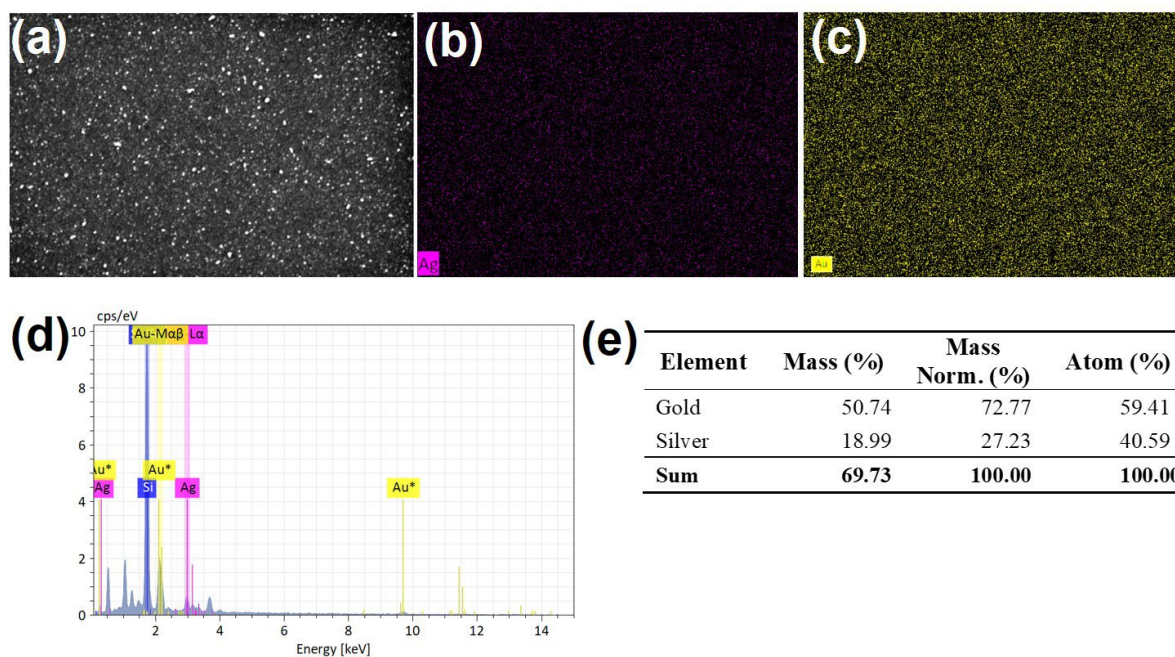

**Figure S2.** EDX analysis of Au@AgNIF (a) SEM image, (b) Ag mapping, (c) Au mapping, (d) EDX spectrum, and (e) elemental composition.

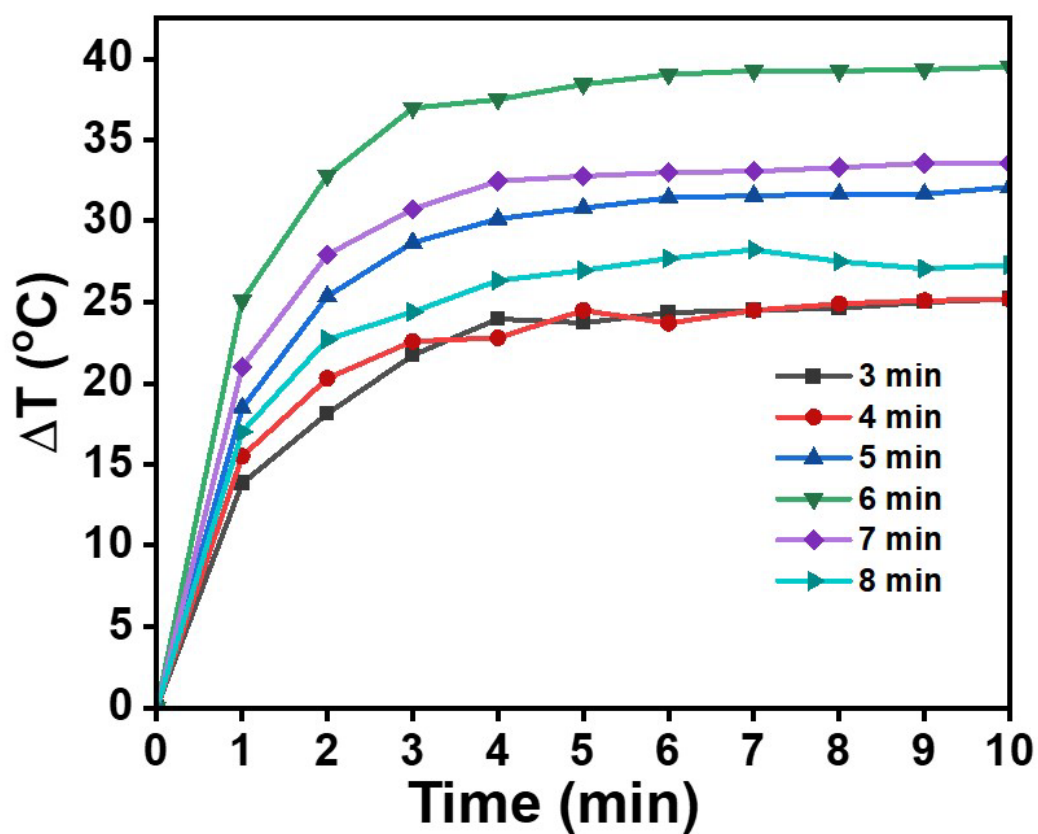

**Figure S3.** Photothermal performances of Au@AgNIFs with the growth times of 3, 4, 5, 6, 7, and 8 min, respectively.
